# Supplementary material for: Improved spectrophotometric assay for lytic polysaccharide monooxygenase
Source: PubMed Central journal article supplement (PMC6894463; doi:10.1186/s13068-019-1624-3), 2019-12-05
Supplement: 13068_2019_1624_MOESM1_ESM.pdf [file 13068_2019_1624_MOESM1_ESM.pdf]

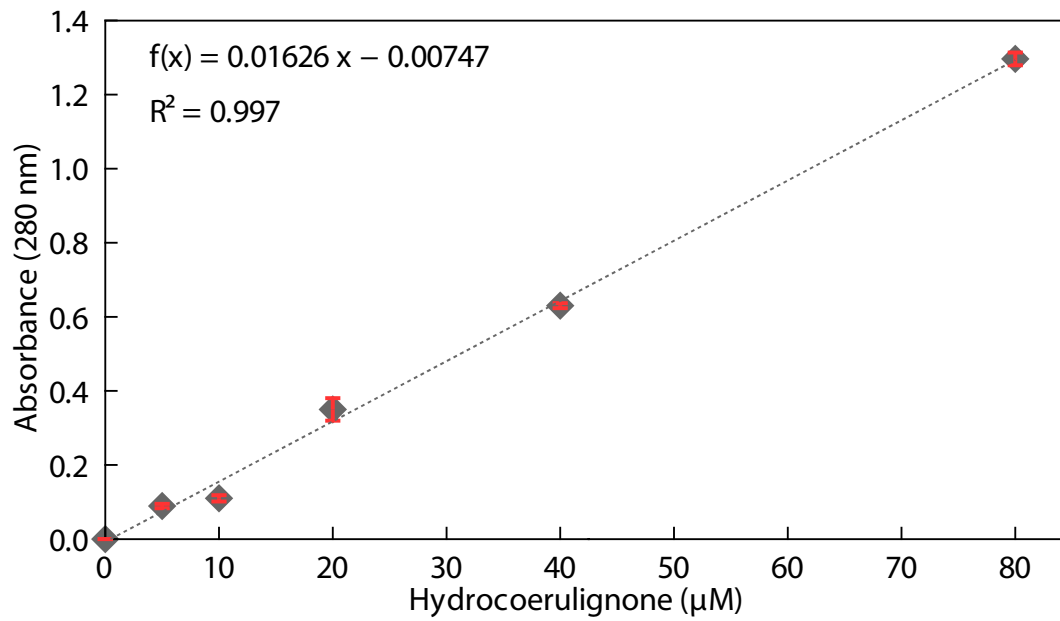

Additional file 1. Absorbance of different hydrocoerulignone concentrations at 280 nm for the calculation of the molar absorbance coefficient ( $\epsilon_{280} = 16260 \text{ M}^{-1} \text{ cm}^{-1}$ ). LibreOffice\_v.6 (Berlin, Germany) was used for a linear regression fit, the calculation of the slope and intercept. Measured in 50 mM sodium-phosphate buffer at pH 6.0.
