# Supplementary material for: Improved spectrophotometric assay for lytic polysaccharide monooxygenase
Source: PubMed Central journal article supplement (PMC6894463; doi:10.1186/s13068-019-1624-3), 2019-12-05
Supplement: 13068_2019_1624_MOESM2_ESM.pdf [file 13068_2019_1624_MOESM2_ESM.pdf]

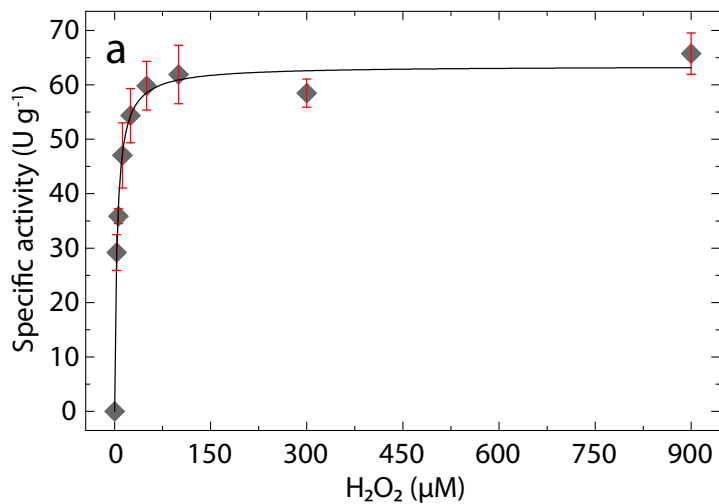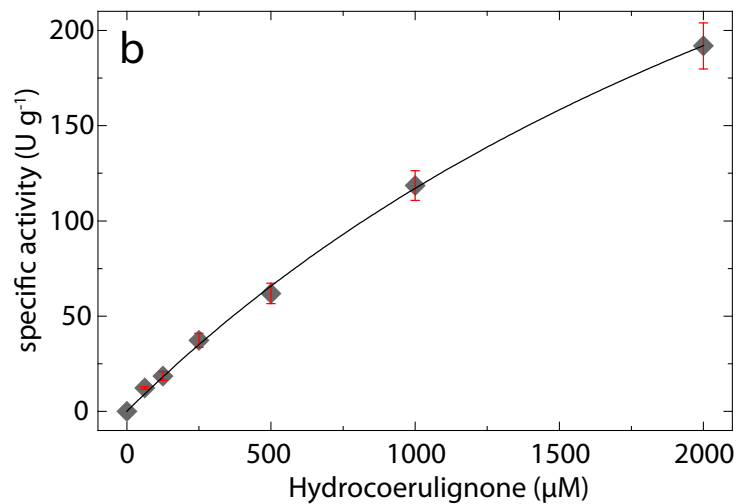

Additional file 2. (a) Steady-state kinetic measurements of hydrogen peroxide with 500 μM hydrocoerulignone and (b) of hydrocoerulignone with 100 μM H<sub>2</sub>O<sub>2</sub>. No saturation was achieved for hydrocoerulignone and therefore the kinetic constants for H<sub>2</sub>O<sub>2</sub> were determined under apparent, non-pseudo-first-order conditions.
