# Supplementary material for: Improved spectrophotometric assay for lytic polysaccharide monooxygenase
Source: PubMed Central journal article supplement (PMC6894463; doi:10.1186/s13068-019-1624-3), 2019-12-05
Supplement: 13068_2019_1624_MOESM3_ESM.pdf [file 13068_2019_1624_MOESM3_ESM.pdf]

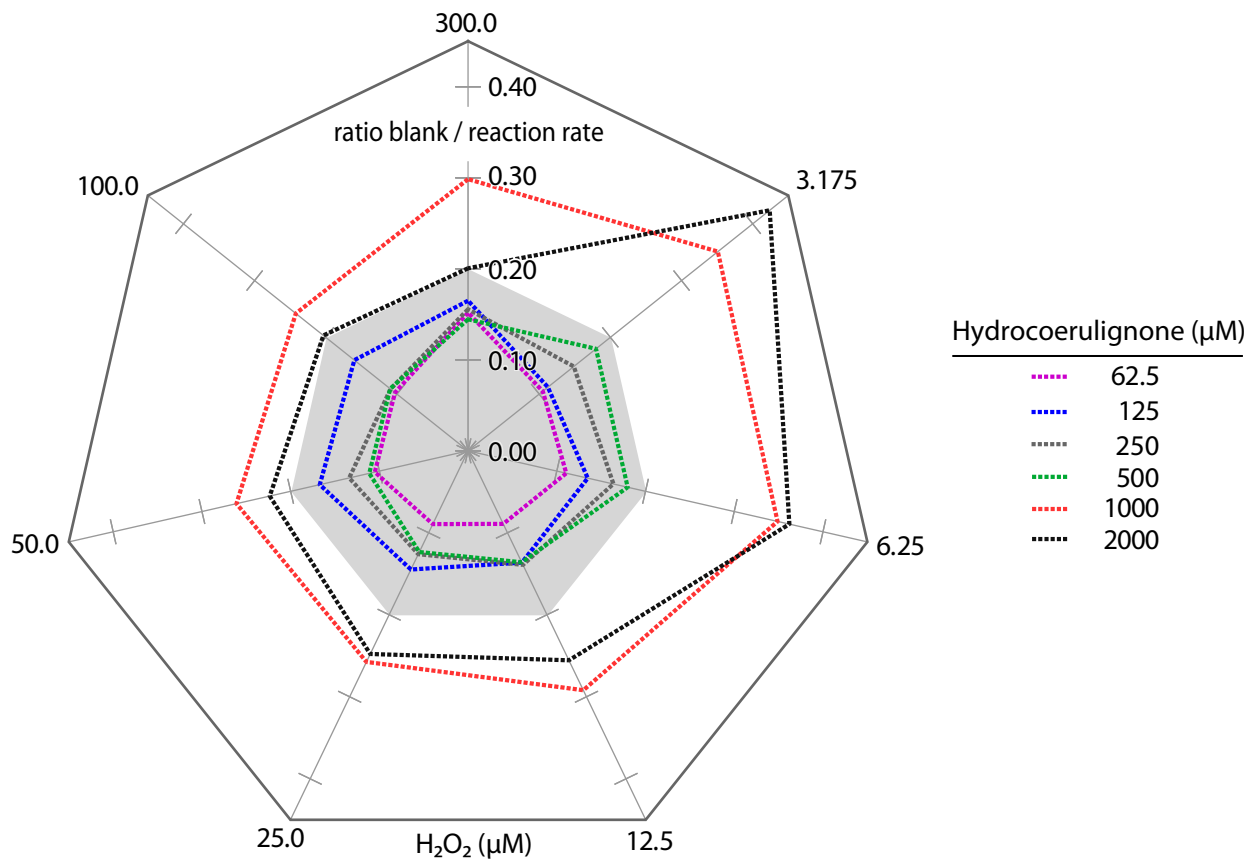

Additional file 3. Ratio of blank reactions and reaction rates with LPMO of different hydrocoerulignone and H<sub>2</sub>O<sub>2</sub> concentrations. Grey area, blank reaction lower than 20% of total reaction rate. Measured in 50 mM sodium-phosphate buffer at pH 6.0 with *NcLPMO9c* at 30°C.
